# Supplementary material for: Peptides interfering with protein-protein interactions in the ethylene signaling pathway delay tomato fruit ripening
Source: PubMed Central journal article supplement (PMC4967898; doi:10.1038/srep30634), 2016-08-01
Supplement: srep30634-s1.pdf [file srep30634-s1.pdf]

## **Peptides interfering with protein-protein interactions in the ethylene signaling pathway delay tomato fruit ripening**

Melanie M.A. Bisson<sup>1, #</sup>, Mareike Kessenbrock<sup>1, #</sup>, Lena Müller<sup>1</sup>, Alexander Hofmann<sup>1</sup>, Florian Schmitz<sup>1</sup>, Simona M. Cristescu<sup>2</sup> and Georg Groth<sup>1\*</sup>

<sup>1</sup> Biochemical Plant Physiology, Heinrich-Heine-University Düsseldorf, D-40204 Düsseldorf, Germany

<sup>2</sup> Department of Molecular and Laser Physics, Radboud University, Heyendaalseweg 135, 6525 AJ Nijmegen, The Netherlands

\* Corresponding author: [georg.groth@hhu.de](mailto:georg.groth@hhu.de)

# These authors contributed equally to this work

## Supplementary Figures

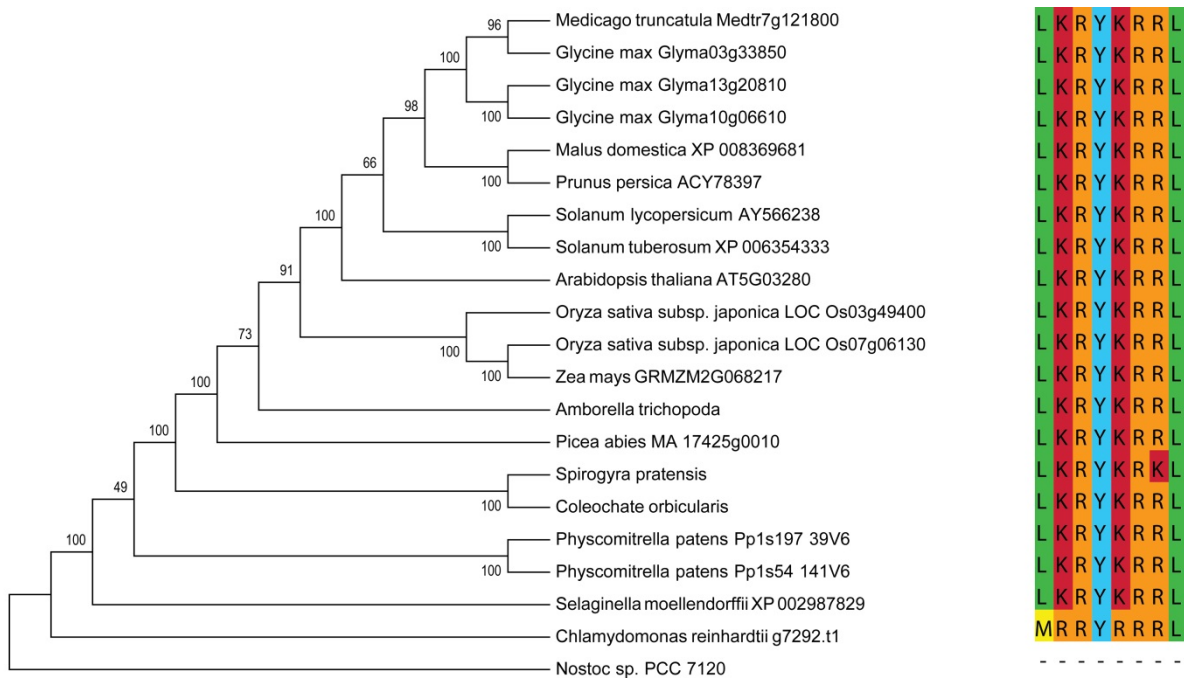

**Figure S1: Phylogenetic analysis of EIN2 protein sequences from selected organisms.** On the left the phylogenetic analysis of EIN2 protein sequences from selected organisms is depicted. Sequences were retrieved as the best BLASTp hits (best two for *Oryza sativa* subsp. *Japonica*, *Physcomitrella patens* and three for *Glycine max* respectively)<sup>1</sup> at NCBI (<http://blast.ncbi.nlm.nih.gov/Blast.cgi>) against AtEIN2 (at5g03280). The sequences for *Amborella trichopoda*, *Physcomitrella patens*, *Selaginella moellendorffii* and *Chlamydomonas reinhardtii* were acquired as the best BLASTp hits from Phytozome (<http://phytozome.jgi.doe.gov>). The sequence for *Picea abies* was obtained by BLASTp via Congenie ([www.congenie.org](http://www.congenie.org)) and for *Spirogyra pratensis* (NCBI TSA accession number GBSM01000000) and *Coleochate orbicularis* (NCBI TSA accession number GBSL01000000) as described in ref. 2. Sequences were aligned with the MUSCLE plugin<sup>3</sup> and analyzed in the MEGA6<sup>4</sup> suite. Maximum likelihood analysis was performed with 1000 Bootstrap iterations. Bootstrap values are indicated at the corresponding nodes. The tree was rooted on *Nostoc* sp. PCC 7120. On the right the alignment of the conserved octapeptide is shown corresponding to the protein sequence in the cladogram and colored according to the amino acid side chain.

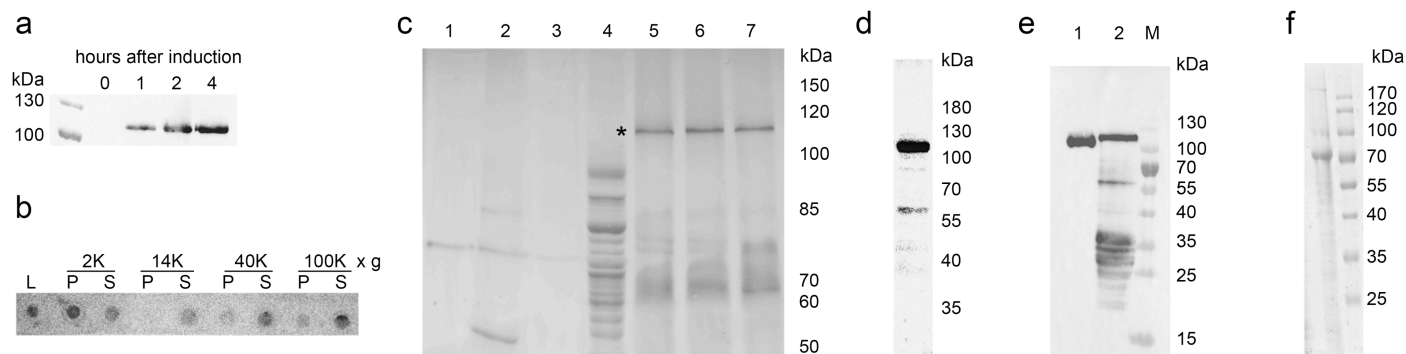

**Figure S2: Heterologous expression and purification of the C-terminal domain of ethylene regulator LeEIN2<sup>462-1316</sup> and tomato ethylene receptor LeETR1.** (a) Western Blot analysis with anti-His antibody reveals proper expression of LeEIN2<sup>462-1316</sup> in *E. coli* after induction with IPTG. (b) Dot-Blot analysis of sequential centrifugation studies of a cell lysate expressing LeEIN2<sup>462-1316</sup> using anti-His antibody. L = lysate, P = pellet, S = supernatant. Largest amount of recombinant protein was found in the supernatant after centrifugation at 100,000 x g reflecting protein production in soluble form. (c) Coomassie-stained SDS-gel with samples of LeEIN2<sup>462-1316</sup> purification. 1-3 = ATP-washing step, 4 = 50 mM imidazole-washing step, 5-7 = elution step, \* = LeEIN2<sup>462-1316</sup> protein. Removal of chaperones (1-3) and nonspecifically bound proteins (4) leads to purified protein after elution (5-7). (d) Western Blot analysis with anti-His antibody identifies additional bands in the lower molecular range of a LeEIN2<sup>462-1316</sup> sample as degradation bands. (e) Identity of degradation bands in LeEIN2<sup>462-1316</sup> sample (lane 2) is proven by co-blotting of PEPC (lane 1). PEPC, previously expressed and isolated from the same *E. coli* host strain, shows no such degradation bands in a Western Blot analysis with anti-His antibody. (f) Coomassie-stained SDS-gel with a purified sample of tomato ethylene receptor protein LeETR1 reflects high purity of recombinant, detergent-solubilized receptor protein.

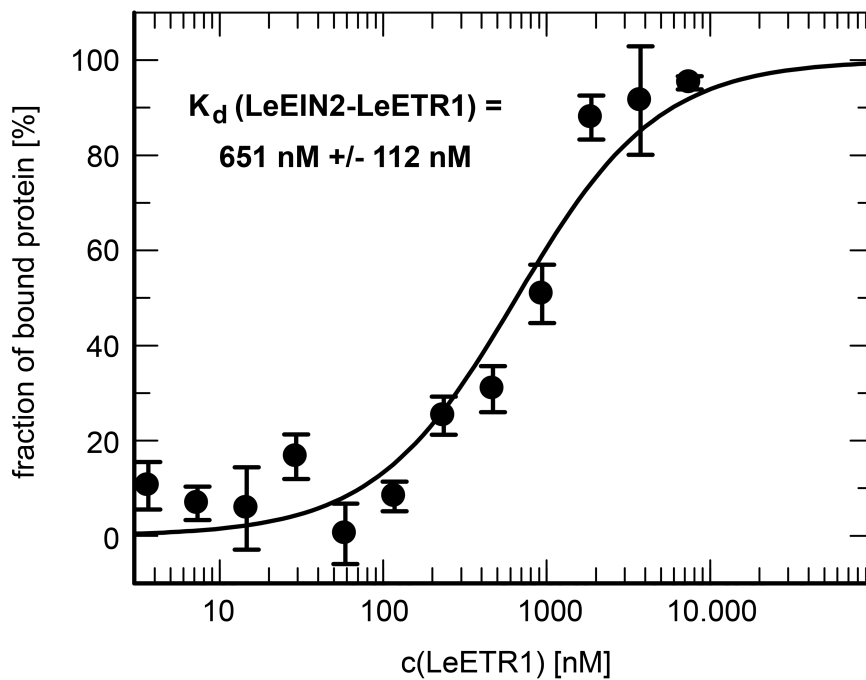

**Figure S3: Interaction studies of tomato ETR1 and EIN2.** Determination of  $K_d$  value of LeEIN2-LeETR1 complex formation based on MST-data is illustrated. LeEIN2<sup>462-1316</sup> was labelled with Alexa Fluor 488 succinimidyl-ester (Life Technologies) in a buffer containing 50 mM potassium phosphate pH 8.0, 300 mM NaCl and 5 % (v/v) glycerol according to the manufacturer's protocol. Labelled LeEIN2<sup>462-1316</sup> and LeETR1 were transferred in 50 mM Tris-HCl pH 8.0, 300 mM NaCl, 0.015 % (w/v) Fos-Choline-16 and purified LeETR1 was serially diluted in the same buffer in a 1:1 ratio for 12 times, resulting in 7.5  $\mu$ M as highest concentration and 3.66 nM as lowest LeETR1 concentration. These different concentrations of LeETR1 were subsequently mixed with 0.2  $\mu$ M of labelled LeEIN2<sup>462-1316</sup>-Alexa Fluor 488 and samples were transferred into standard glass capillaries for MST. Measurements were carried out using a Monolith NT.115 (NanoTemper Technologies) at 60 % MST power. Fraction of bound LeETR1 was fitted against increasing LeETR1 concentrations. Binding curve was calculated by a model assuming one binding site per binding partner and resulted in a  $K_d = 651$  nM  $\pm$  112 nM. Data represent the mean of three independent measurements  $\pm$  standard deviation.

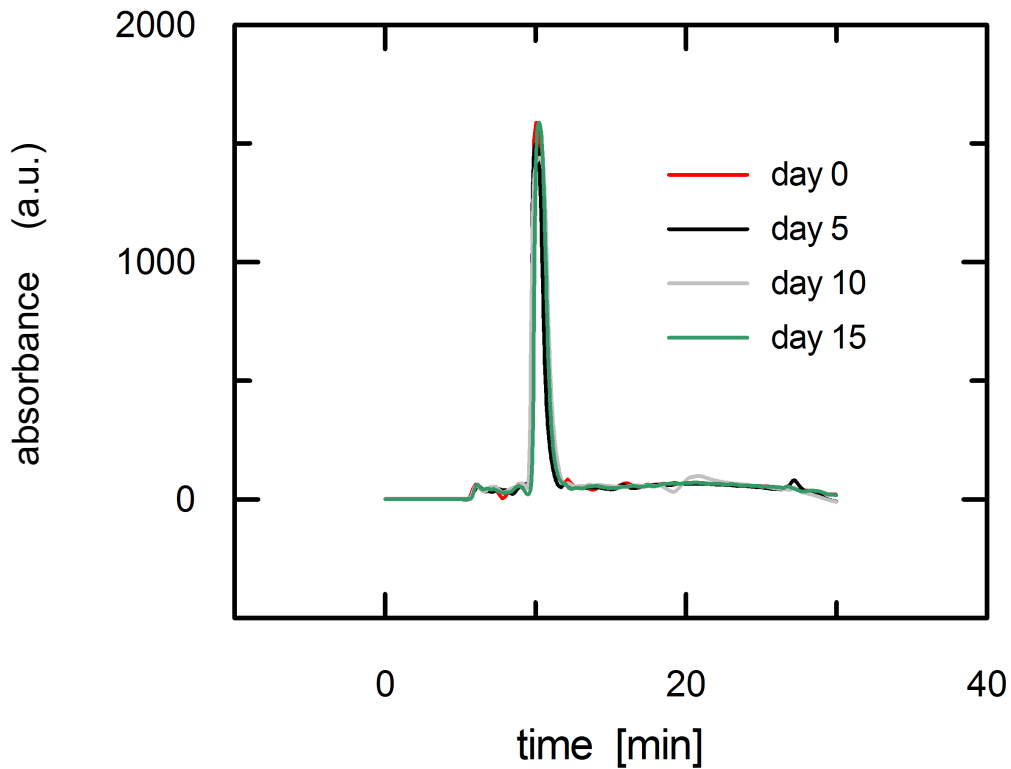

**Figure S4: Analysis of NOP-1 stability by liquid chromatography (LC).**

Lyophilized NOP-1 (500  $\mu\text{g}$ ) was dissolved in 100  $\mu\text{l}$  PBS pH 6.7, incubated for 0 days, 5 days, 10 days and 15 days at room temperatures and then applied to a Supelcosil C18 column (4.6x150 mm). The column was washed with 15 ml  $\text{H}_2\text{O}$  with 0.1% TFA (buffer A). Elution was performed with a linear gradient to 100% buffer B (100% acetonitrile with 0.1% TFA) over 30 min at a flow rate of  $1 \text{ ml min}^{-1}$ . Detection was set to 215 nm. Identity of the peptide was confirmed by mass spectrometry.

## Supplementary References

1. Miyata, K., Kawaguchi, M. & Nakagawa, T. Two distinct EIN2 genes cooperatively regulate ethylene signaling in lotus japonicus. *Plant and Cell Physiology* **54**, 1469-1477, (2013).
2. Ju, C. *et al.* Conservation of ethylene as a plant hormone over 450 million years of evolution. *Nature Plants* **1**, 1-7, (2015).
3. Edgar, R. C. MUSCLE: Multiple sequence alignment with high accuracy and high throughput. *Nucleic Acids Research* **32**, 1792-1797, (2004).
4. Tamura, K., Stecher, G., Peterson, D., Filipski, A. & Kumar, S. MEGA6: Molecular evolutionary genetics analysis version 6.0. *Molecular Biology and Evolution* **30**, 2725-2729, (2013).
